# Supplementary material for: Multiple alleles at a single locus control seed dormancy in Swedish Arabidopsis
Source: eLife. 2016 Dec 14;5:e22502. doi: 10.7554/eLife.22502 (PMC5226650; doi:10.7554/eLife.22502)
Supplement: Figure 1—source data 1. — Geographic information and GR21 values used to generate Figure 1 and perform GWAS. DOI: http://dx.doi.org/10.7554/eLife.22502.003 [file elife-22502-fig1-data1.xlsx]

## Sheet: Sheet1
ID	Name	Latitude	Longitude	GR21
992	Ale-Stenar-44-4	55.3833	14.05	0
997	Ale-Stenar-56-14	55.3833	14.05	4.61538
1002	Ale-Stenar-64-24	55.3833	14.05	0.833333
1435	Röd-17-319	62.8	18.2	64.1026
5830	App1-12	56.3333	15.9667	47.0588
5831	App1-14	56.3333	15.9667	0
5832	App1-16	56.3333	15.9667	0
5856	Dör-10	63.0167	17.4914	93.8462
5867	Dra2-1	55.76	14.12	63.2911
6012	Eden-7	62.877	18.177	78.4615
6013	Eden-9	62.877	18.177	23.75
6016	Eds-1	62.9	18.4	96.2264
6017	Eds-9	62.9	18.4	75
6019	Fjä1-2	56.06	14.29	5.10204
6020	Fjä1-5	56.06	14.29	0
6021	Fjä2-4	56.06	14.29	96.2264
6023	Fly2-1	55.7509	13.3712	0
6024	Fly2-2	55.7509	13.3712	0
6025	Gro-3	62.6437	17.7339	100
6030	Grön-5	62.806	18.1896	100
6034	Hov1-7	56.1	13.74	94.0171
6035	Hov1-10	56.1	13.74	96.3158
6036	Hov3-2	56.1	13.74	100
6038	Hov3-5	56.1	13.74	97.0238
6039	Hovdala-2	56.1	13.74	100
6040	Kni-1	55.66	13.4	0
6041	Lis-3	56.0328	14.775	97.6923
6042	Lom1-1	56.09	13.9	86.3636
6043	Löv-1	62.801	18.079	96.7742
6046	Löv-5	62.801	18.079	100
6064	Nyl-2	62.9513	18.2763	100
6069	Nyl-7	62.9513	18.2763	97.7444
6071	Omn-5	62.9308	18.3448	33.3333
6073	ÖMö1-7	56.1481	15.8155	0
6074	Ör-1	56.4573	16.1308	25
6076	Rev-2	55.6942	13.4504	1
6085	Sparta-1	55.7097	13.2145	32.1212
6086	Sr:3	58.9	11.2	73.6842
6090	T1000	55.6525	13.2197	0
6092	T1020	55.6514	13.2233	11.811
6097	T1070	55.6481	13.2264	0
6098	T1080	55.6561	13.2178	0
6099	T1090	55.6575	13.2386	82.7586
6100	T1110	55.6	13.2	11.8421
6102	T1130	55.6	13.2	40.625
6104	T1160	55.7	13.2	2.06897
6106	T460	55.7931	13.1186	1
6107	T470	55.7942	13.1222	22.8571
6108	T480	55.7989	13.1206	65.812
6111	T530	55.7989	13.1219	0
6112	T540	55.7967	13.1044	5.83942
6114	T570	55.8097	13.1342	0
6125	T710	55.8403	13.3106	0
6126	T720	55.8411	13.3047	19.8953
6128	T740	55.8397	13.2881	0
6131	T780	55.8369	13.3181	0
6132	T790	55.8386	13.3186	2.5974
6133	T800	55.8364	13.2906	0
6136	T840	55.9336	13.5519	3.33333
6137	T850	55.9419	13.5603	0
6138	T860	55.9403	13.5511	5.42169
6140	T880	55.9392	13.5539	1
6142	T900	55.9428	13.5558	0.833333
6145	T930	55.9497	13.5533	23.9316
6148	T960	55.9319	13.5508	0
6150	T980	55.9261	13.5319	1
6151	T990	55.6528	13.2244	0
6154	TAA 04	62.6422	17.7406	100
6163	TAA 14	62.6425	17.7356	100
6166	TAA 17	62.6425	17.7372	100
6169	TÅD 01	62.8714	18.3447	92.3077
6171	TÅD 03	62.8717	18.3444	100
6172	TÅD 04	62.8717	18.3436	95.935
6173	TÅD 05	62.8717	18.3419	78.5714
6174	TÅD 06	62.8719	18.3422	83.3333
6177	TÄL 03	62.6322	17.69	99.1667
6180	TÄL 07	62.6322	17.6906	99
6184	TBÖ 01	62.8892	18.4522	100
6188	TDr-1	55.7683	14.1386	100
6189	TDr-2	55.7686	14.1383	11.9048
6193	TDr-7	55.7694	14.1347	60.7143
6194	TDr-8	55.7706	14.1342	96.4103
6195	TDr-9	55.7708	14.1342	14.9254
6198	TDr-13	55.7708	14.1331	99.1667
6201	TDr-16	55.7719	14.1211	98.3333
6202	TDr-17	55.7717	14.1206	99.2308
6209	TEDEN 02	62.8836	18.1842	4.41989
6210	TEDEN 03	62.8839	18.1836	10
6216	TFÄ 06	63.0167	18.3283	99.2308
6217	TFÄ 07	63.0169	18.3283	100
6218	TFÄ 08	63.0172	18.3283	100
6220	TGR 01	62.806	18.1896	100
6231	TNY 04	62.96	18.2844	100
6238	TOM 04	62.9619	18.35	75.2137
6240	TOM 06	62.9622	18.35	97
6241	TOM 07	62.9614	18.3608	92.3077
6242	Tomegap-2	55.7	13.2	2.61438
6243	Tottarp-2	56.2737	13.9004	97.9592
6244	TRÄ 01	62.9169	18.4728	100
6258	TV-10	55.5796	14.3336	84.0708
6268	TV-22	55.5796	14.3336	6.19469
6276	TV-30	55.5796	14.3336	23.8938
6284	TV-38	55.5796	14.3336	2
6913	Eden-2	62.877	18.177	100
6973	Ull2-3	56.0648	13.9707	2.91262
6974	Ull2-5	56.0648	13.9707	0
7516	Vår2-1	55.58	14.334	0
7518	ÖMö2-1	56.14	15.78	0
8222	Lis-2	56.0328	14.775	0
8230	Algutsrum	56.68	16.5	13.4615
8231	Brö1-6	56.3	16	3.18471
8237	Kävlinge-1	55.8	13.1	0
8240	Kulturen-1	55.705	13.196	0
8241	Liarum	55.9473	13.821	6.04027
8242	Lillö-1	56.1494	15.7884	19.5804
8247	San-2	56.07	13.74	94.9367
8249	Vimmerby	57.7	15.8	99
8256	Bå1-2	56.4	12.9	78.7037
8258	Bå4-1	56.4	12.9	0
8259	Bå5-1	56.4	12.9	28.4768
8283	Dra3-1	55.76	14.12	99.2308
8306	Hov4-1	56.1	13.74	0
8334	Lu-1	55.71	13.2	0
8335	Lund	55.71	13.2	1
8369	Rev-1	55.6942	13.4504	10.1562
8376	Sanna-2	62.69	18	100
8386	Sr:5	58.9	11.2	88.3495
8387	St-0	59	18	0
9057	Vinslöv	56.1	13.9167	10.2941
9058	Västervik	57.75	16.6333	96.1538
9321	Ådal 1	62.8622	18.336	100
9323	Ådal 3	62.8622	18.336	70.9677
9382	Fri 2	55.8106	14.2091	43.0108
9386	Grön 12	62.806	18.1896	100
9388	Grön 14	62.806	18.1896	100
9390	Hadd-1	57.3263	15.8979	99
9391	Hadd-2	57.3263	15.8979	87.2727
9399	Hamm-1	55.4234	13.9905	3.05344
9402	Hel-3	57.8765	14.8549	21.4953
9404	HolA-1 1	55.7491	13.399	0
9405	HolA-1 2	55.7491	13.399	0
9407	HolA-2 2	55.7491	13.399	3.27869
9408	Kal 1	56.047	13.9519	22.8916
9409	Kia 1	56.0573	14.302	0
9412	Kor 3	57.2746	16.1494	28
9416	Kru-3	57.7215	18.3837	82.1429
9421	Lan 1	55.9745	14.3997	1
9427	Näs 2	62.8815	18.4055	100
9433	Nyl 13	62.9513	18.2763	93
9434	Öde 2	62.8959	18.3659	100
9437	Puk-2	56.1633	14.6806	28.5714
9442	Sim-1	55.5678	14.3398	0
9450	Spro 1	57.2545	18.2109	53.5714
9451	Spro 2	57.2545	18.2109	92.4242
9453	Stenk-2	57.8009	18.5162	0
9454	Stenk-3	57.8009	18.5162	0
9455	Stenk-4	57.8009	18.5162	0
9470	Tur-4	57.6511	14.8043	74.0741
9471	Ull-A-1	56.0648	13.9707	87.5
9476	VårA 1	55.5796	14.3336	0
9481	Yst-1	55.4242	13.8484	4
