# Supplementary material for: Multiple alleles at a single locus control seed dormancy in Swedish Arabidopsis
Source: eLife. 2016 Dec 14;5:e22502. doi: 10.7554/eLife.22502 (PMC5226650; doi:10.7554/eLife.22502)
Supplement: Figure 3—source data 1. — LOD scores and positions of 95% confidence interval of the major QTLs presented in Figure 3A. DOI: http://dx.doi.org/10.7554/eLife.22502.009 [file elife-22502-fig3-data1.xlsx]

## Sheet: Figure 3-source data 44.csv
pop	pheno	chr	model	max_lod	down_95	max_lod_pos	up_95	direction
6163x6210	GR21	1	MQMcof	4.36763	10720291	16872100	19778790	2
6163x6210	GR21	1	MQMcof	4.05232	26783834	29691452	29691452	1
6163x6210	GR21	2	MQMcof	9.35359	41470873	44685725	49077116	2
6163x6210	GR21	3	MQMcof	5.60536	52423887	56117763	60167852	2
6163x6210	GR21	4	MQMcof	5.13642	88165969	91318256	94741930	2
6163x6210	GR21	5	MQMcof	5.29721	105619351	112599797	117069095	2
6210x6180	GR21	3	MQMcof	24.1488	63120427	73424252	75407157	1
6210x6180	GR21	5	MQMcof	10.7017	110072039	112599797	117069095	1
9332x6974	GR21	1	MQMcof	5.25012	1042322	3737080	7198045	2
9332x6974	GR21	5	MQMcof	26.6916	111218966	113783157	122374511	2
6913x6073	GR21	5	MQMcof	18.8147	113071000	114671000	117471000	2
6217x9454	GR21	4	MQMcof	4.9649	83486000	87686000	88286000	2
6217x9454	GR21	5	MQMcof	14.567	113871000	114271000	115271000	2
6140x9388	GR21	4	MQMcof	5.19818	87086000	88486000	94286000	1
6140x9388	GR21	5	MQMcof	5.93456	112271000	114871000	116071000	1
