# Supplementary material for: Multiple alleles at a single locus control seed dormancy in Swedish Arabidopsis
Source: eLife. 2016 Dec 14;5:e22502. doi: 10.7554/eLife.22502 (PMC5226650; doi:10.7554/eLife.22502)
Supplement: Figure 3—source data 2. — GR21 values of the transgenic lines used to generate Figure 3B. DOI: http://dx.doi.org/10.7554/eLife.22502.010 [file elife-22502-fig3-data2.xlsx]

## Sheet: Figure 3-figure supplement 5.cs
allele	trans_id	GR21
SNP3	1	84.7081
SNP3	2	3.4082
SNP3	3	13.0536
SNP3	4	95.6365
SNP3	5	91.4291
SNP3	6	0.333333
SNP3	7	17.0472
SNP3	8	9.68682
SNP3	9	10.4477
SNP3	10	7.4701
SNP3	11	4.24612
SNP3	15	80.9487
SNP3	16	76.8508
SNP3	18	20.2625
SNP3	19	89.1686
SNP3	20	0.333333
SNP3	22	69.1412
SNP3	24	1.48148
SNP2	1	92.6016
SNP2	2	7.99871
SNP2	4	3.55083
SNP2	6	77.8873
SNP2	11	5.71733
SNP2	14	50.0694
SNP2	15	0.333333
SNP2	16	98.3333
SNP2	17	1.9232
SNP2	18	25.2859
SNP2	19	7.61006
SNP2	20	84.985
ND	3	96.2963
ND	4	93.0667
ND	5	99
ND	6	84.4852
ND	7	59.0657
ND	9	98
ND	11	64.3797
ND	12	99.3333
ND	13	98.3333
ND	15	7.64982
ND	16	79.29
ND	17	12.9957
ND	18	99.3333
ND	19	83
ND	20	71.6822
ND	22	51.6251
ND	23	98
ND	26	29.5397
ND	27	21.0438
ND	29	90.3333
ND	30	93.8571
