# Supplementary material for: Multiple alleles at a single locus control seed dormancy in Swedish Arabidopsis
Source: eLife. 2016 Dec 14;5:e22502. doi: 10.7554/eLife.22502 (PMC5226650; doi:10.7554/eLife.22502)
Supplement: Figure 3—source data 3. — DOI: http://dx.doi.org/10.7554/eLife.22502.011 [file elife-22502-fig3-data3.xlsx]

## Sheet: Sheet1
ID	Name	Latitude	Longitude	GR21	DOG1 Hap.	SNP1	SNP2	SNP3	SNP4
9332	Bar 1	62.8698	18.381	100	ND	0	0	0	0
