# Supplementary material for: Multiple alleles at a single locus control seed dormancy in Swedish Arabidopsis
Source: eLife. 2016 Dec 14;5:e22502. doi: 10.7554/eLife.22502 (PMC5226650; doi:10.7554/eLife.22502)
Supplement: Figure 3—source data 4. — We provide the genotype of the accessions at SNP1-SNP4 as well as their DOG1 haplotype. DOI: http://dx.doi.org/10.7554/eLife.22502.012 [file elife-22502-fig3-data4.xlsx]

## Sheet: Sheet1
ID	Name	Latitude	Longitude	GR21	DOG1 Hap.	SNP1	SNP2	SNP3	SNP4
992	Ale-Stenar-44-4	55.3833	14.05	0	D3	1	0	1	0
997	Ale-Stenar-56-14	55.3833	14.05	4.61538	D3	1	0	1	0
1002	Ale-Stenar-64-24	55.3833	14.05	0.833333	D2	0	1	0	0
1435	Röd-17-319	62.8	18.2	64.1026	ND	0	0	0	0
5830	App1-12	56.3333	15.9667	47.0588	D2	0	1	0	0
5831	App1-14	56.3333	15.9667	0	D2	0	1	0	0
5832	App1-16	56.3333	15.9667	0	D2	1	1	0	0
5856	Dör-10	63.0167	17.4914	93.8462	ND	0	0	0	0
5867	Dra2-1	55.76	14.12	63.2911	ND	0	0	0	0
6012	Eden-7	62.877	18.177	78.4615	ND	0	0	0	0
6013	Eden-9	62.877	18.177	23.75	D4	0	0	0	1
6016	Eds-1	62.9	18.4	96.2264	ND	0	0	0	0
6017	Eds-9	62.9	18.4	75	ND	0	0	0	0
6019	Fjä1-2	56.06	14.29	5.10204	D2	1	1	0	0
6020	Fjä1-5	56.06	14.29	0	D2	1	1	0	0
6021	Fjä2-4	56.06	14.29	96.2264	D2	1	1	0	0
6023	Fly2-1	55.7509	13.3712	0	D2	1	1	0	0
6024	Fly2-2	55.7509	13.3712	0	D2	1	1	0	0
6025	Gro-3	62.6437	17.7339	100	ND	0	0	0	0
6030	Grön-5	62.806	18.1896	100	ND	0	0	0	0
6034	Hov1-7	56.1	13.74	94.0171	ND	0	0	0	0
6035	Hov1-10	56.1	13.74	96.3158	ND	0	0	0	0
6036	Hov3-2	56.1	13.74	100	ND	0	0	0	0
6038	Hov3-5	56.1	13.74	97.0238	ND	0	0	0	0
6039	Hovdala-2	56.1	13.74	100	ND	0	0	0	0
6040	Kni-1	55.66	13.4	0	D2	1	1	0	0
6041	Lis-3	56.0328	14.775	97.6923	ND	0	0	0	0
6042	Lom1-1	56.09	13.9	86.3636	ND	0	0	0	0
6043	Löv-1	62.801	18.079	96.7742	ND	0	0	0	0
6046	Löv-5	62.801	18.079	100	ND	0	0	0	0
6064	Nyl-2	62.9513	18.2763	100	ND	0	0	0	0
6069	Nyl-7	62.9513	18.2763	97.7444	ND	0	0	0	0
6071	Omn-5	62.9308	18.3448	33.3333	ND	0	0	0	0
6073	ÖMö1-7	56.1481	15.8155	0	D2	0	1	0	0
6074	Ör-1	56.4573	16.1308	25	ND	0	0	0	0
6076	Rev-2	55.6942	13.4504	1	D2	1	1	0	0
6085	Sparta-1	55.7097	13.2145	32.1212	D2	1	1	0	0
6086	Sr:3	58.9	11.2	73.6842	ND	0	0	0	0
6090	T1000	55.6525	13.2197	0	D2	1	1	0	0
6092	T1020	55.6514	13.2233	11.811	D2	1	1	0	0
6097	T1070	55.6481	13.2264	0	D2	1	1	0	0
6098	T1080	55.6561	13.2178	0	D2	1	1	0	0
6099	T1090	55.6575	13.2386	82.7586	ND	0	0	0	0
6100	T1110	55.6	13.2	11.8421	D2	1	1	0	0
6102	T1130	55.6	13.2	40.625	D2	1	1	0	0
6104	T1160	55.7	13.2	2.06897	D2	1	1	0	0
6106	T460	55.7931	13.1186	1	D2	1	1	0	0
6107	T470	55.7942	13.1222	22.8571	D2	1	1	0	0
6108	T480	55.7989	13.1206	65.812	ND	0	0	0	0
6111	T530	55.7989	13.1219	0	D2	1	1	0	0
6112	T540	55.7967	13.1044	5.83942	D2	1	1	0	0
6114	T570	55.8097	13.1342	0	D2	1	1	0	0
6125	T710	55.8403	13.3106	0	D2	1	1	0	0
6126	T720	55.8411	13.3047	19.8953	D2	1	1	0	0
6128	T740	55.8397	13.2881	0	D2	1	1	0	0
6131	T780	55.8369	13.3181	0	D2	1	1	0	0
6132	T790	55.8386	13.3186	2.5974	D3	1	0	1	0
6133	T800	55.8364	13.2906	0	D2	1	1	0	0
6136	T840	55.9336	13.5519	3.33333	D2	1	1	0	0
6137	T850	55.9419	13.5603	0	D2	1	1	0	0
6138	T860	55.9403	13.5511	5.42169	D2	1	1	0	0
6140	T880	55.9392	13.5539	1	D2	1	1	0	0
6142	T900	55.9428	13.5558	0.833333	D2	1	1	0	0
6145	T930	55.9497	13.5533	23.9316	D2	1	1	0	0
6148	T960	55.9319	13.5508	0	D2	1	1	0	0
6150	T980	55.9261	13.5319	1	D2	1	1	0	0
6151	T990	55.6528	13.2244	0	D2	1	1	0	0
6154	TAA 04	62.6422	17.7406	100	ND	0	0	0	0
6163	TAA 14	62.6425	17.7356	100	ND	0	0	0	0
6166	TAA 17	62.6425	17.7372	100	ND	0	0	0	0
6169	TÅD 01	62.8714	18.3447	92.3077	ND	0	0	0	0
6171	TÅD 03	62.8717	18.3444	100	ND	0	0	0	0
6172	TÅD 04	62.8717	18.3436	95.935	ND	0	0	0	0
6173	TÅD 05	62.8717	18.3419	78.5714	ND	0	0	0	0
6174	TÅD 06	62.8719	18.3422	83.3333	ND	0	0	0	0
6177	TÄL 03	62.6322	17.69	99.1667	ND	0	0	0	0
6180	TÄL 07	62.6322	17.6906	99	ND	0	0	0	0
6184	TBÖ 01	62.8892	18.4522	100	ND	0	0	0	0
6188	TDr-1	55.7683	14.1386	100	ND	0	0	0	0
6189	TDr-2	55.7686	14.1383	11.9048	ND	0	0	0	0
6193	TDr-7	55.7694	14.1347	60.7143	ND	0	0	0	0
6194	TDr-8	55.7706	14.1342	96.4103	ND	0	0	0	0
6195	TDr-9	55.7708	14.1342	14.9254	ND	0	0	0	0
6198	TDr-13	55.7708	14.1331	99.1667	ND	0	0	0	0
6201	TDr-16	55.7719	14.1211	98.3333	D3	1	0	1	0
6202	TDr-17	55.7717	14.1206	99.2308	ND	0	0	0	0
6209	TEDEN 02	62.8836	18.1842	4.41989	D4	0	0	0	1
6210	TEDEN 03	62.8839	18.1836	10	D4	0	0	0	1
6216	TFÄ 06	63.0167	18.3283	99.2308	ND	0	0	0	0
6217	TFÄ 07	63.0169	18.3283	100	ND	0	0	0	0
6218	TFÄ 08	63.0172	18.3283	100	ND	0	0	0	0
6220	TGR 01	62.806	18.1896	100	ND	0	0	0	0
6231	TNY 04	62.96	18.2844	100	ND	0	0	0	0
6238	TOM 04	62.9619	18.35	75.2137	ND	0	0	0	0
6240	TOM 06	62.9622	18.35	97	ND	0	0	0	0
6241	TOM 07	62.9614	18.3608	92.3077	ND	0	0	0	0
6242	Tomegap-2	55.7	13.2	2.61438	D3	1	0	1	0
6243	Tottarp-2	56.2737	13.9004	97.9592	ND	0	0	0	0
6244	TRÄ 01	62.9169	18.4728	100	ND	0	0	0	0
6258	TV-10	55.5796	14.3336	84.0708	ND	0	0	0	0
6268	TV-22	55.5796	14.3336	6.19469	ND	0	0	0	0
6276	TV-30	55.5796	14.3336	23.8938	ND	0	0	0	0
6284	TV-38	55.5796	14.3336	2	D2	1	1	0	0
6913	Eden-2	62.877	18.177	100	ND	0	0	0	0
6973	Ull2-3	56.0648	13.9707	2.91262	D3	1	0	1	0
6974	Ull2-5	56.0648	13.9707	0	D3	1	0	1	0
7516	Vår2-1	55.58	14.334	0	D2	1	1	0	0
7518	ÖMö2-1	56.14	15.78	0	D2	0	1	0	0
8222	Lis-2	56.0328	14.775	0	D2	1	1	0	0
8230	Algutsrum	56.68	16.5	13.4615	D2	1	1	0	0
8231	Brö1-6	56.3	16	3.18471	D2	1	1	0	0
8237	Kävlinge-1	55.8	13.1	0	D2	1	1	0	0
8240	Kulturen-1	55.705	13.196	0	D2	1	1	0	0
8241	Liarum	55.9473	13.821	6.04027	D2	1	1	0	0
8242	Lillö-1	56.1494	15.7884	19.5804	ND	0	0	0	0
8247	San-2	56.07	13.74	94.9367	D2	1	1	0	0
8249	Vimmerby	57.7	15.8	99	ND	0	0	0	0
8256	Bå1-2	56.4	12.9	78.7037	ND	0	0	0	0
8258	Bå4-1	56.4	12.9	0	D2	1	1	0	0
8259	Bå5-1	56.4	12.9	28.4768	D2	1	1	0	0
8283	Dra3-1	55.76	14.12	99.2308	ND	0	0	0	0
8306	Hov4-1	56.1	13.74	0	D2	1	1	0	0
8334	Lu-1	55.71	13.2	0	D3	1	0	1	0
8335	Lund	55.71	13.2	1	D2	1	1	0	0
8369	Rev-1	55.6942	13.4504	10.1562	D2	1	1	0	0
8376	Sanna-2	62.69	18	100	ND	0	0	0	0
8386	Sr:5	58.9	11.2	88.3495	ND	0	0	0	0
8387	St-0	59	18	0	ND	0	0	0	0
9057	Vinslöv	56.1	13.9167	10.2941	ND	0	0	0	0
9058	Västervik	57.75	16.6333	96.1538	D2	0	1	0	0
9321	Ådal 1	62.8622	18.336	100	ND	0	0	0	0
9323	Ådal 3	62.8622	18.336	70.9677	ND	0	0	0	0
9382	Fri 2	55.8106	14.2091	43.0108	ND	0	0	0	0
9386	Grön 12	62.806	18.1896	100	ND	0	0	0	0
9388	Grön 14	62.806	18.1896	100	ND	0	0	0	0
9390	Hadd-1	57.3263	15.8979	99	ND	0	0	0	0
9391	Hadd-2	57.3263	15.8979	87.2727	ND	0	0	0	0
9399	Hamm-1	55.4234	13.9905	3.05344	D3	1	0	1	0
9402	Hel-3	57.8765	14.8549	21.4953	D2	1	1	0	0
9404	HolA-1 1	55.7491	13.399	0	D2	1	1	0	0
9405	HolA-1 2	55.7491	13.399	0	D2	1	1	0	0
9407	HolA-2 2	55.7491	13.399	3.27869	D2	1	1	0	0
9408	Kal 1	56.047	13.9519	22.8916	D2	1	1	0	0
9409	Kia 1	56.0573	14.302	0	D2	1	1	0	0
9412	Kor 3	57.2746	16.1494	28	ND	0	0	0	0
9416	Kru-3	57.7215	18.3837	82.1429	ND	0	0	0	0
9421	Lan 1	55.9745	14.3997	1	D2	1	1	0	0
9427	Näs 2	62.8815	18.4055	100	ND	0	0	0	0
9433	Nyl 13	62.9513	18.2763	93	ND	0	0	0	0
9434	Öde 2	62.8959	18.3659	100	ND	0	0	0	0
9437	Puk-2	56.1633	14.6806	28.5714	ND	0	0	0	0
9442	Sim-1	55.5678	14.3398	0	ND	0	0	0	0
9450	Spro 1	57.2545	18.2109	53.5714	ND	0	0	0	0
9451	Spro 2	57.2545	18.2109	92.4242	ND	0	0	0	0
9453	Stenk-2	57.8009	18.5162	0	D2	0	1	0	0
9454	Stenk-3	57.8009	18.5162	0	D2	0	1	0	0
9455	Stenk-4	57.8009	18.5162	0	D2	1	1	0	0
9470	Tur-4	57.6511	14.8043	74.0741	ND	0	0	0	0
9471	Ull-A-1	56.0648	13.9707	87.5	D2	1	1	0	0
9476	VårA 1	55.5796	14.3336	0	ND	0	0	0	0
9481	Yst-1	55.4242	13.8484	4	D2	1	1	0	0
