# Supplementary figures and images for: Multiple alleles at a single locus control seed dormancy in Swedish Arabidopsis
Source: eLife journal article supplement (doi:10.7554/elife.22502), 2016-12-14

D2 x ND

ND x D3

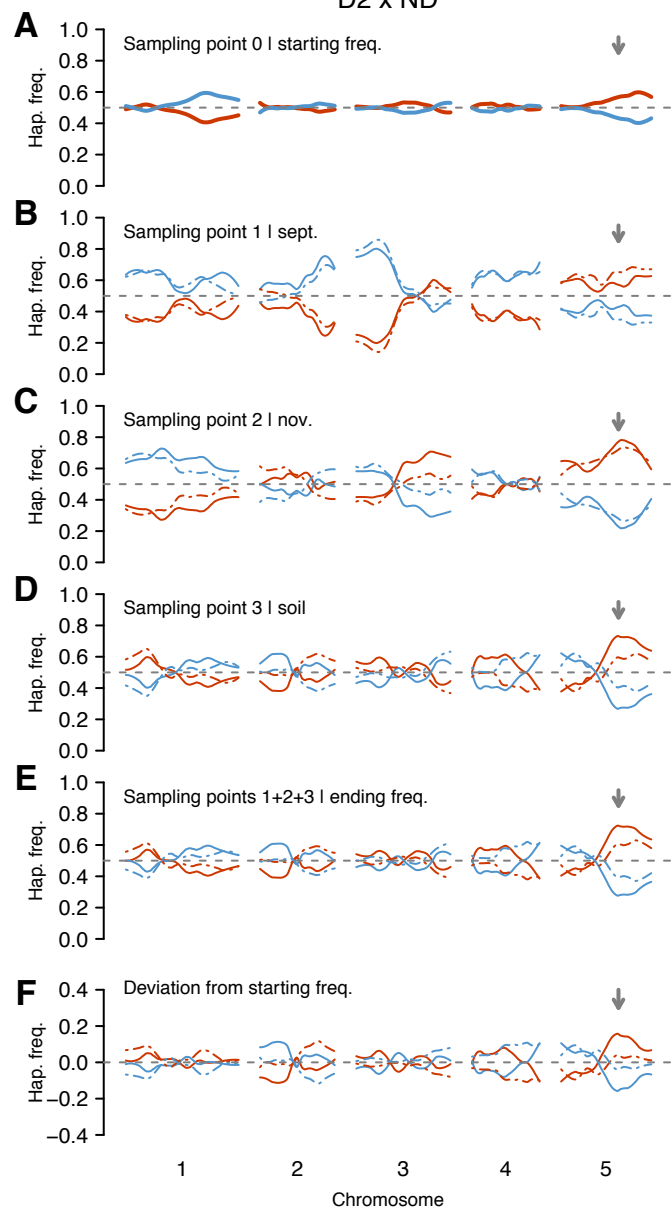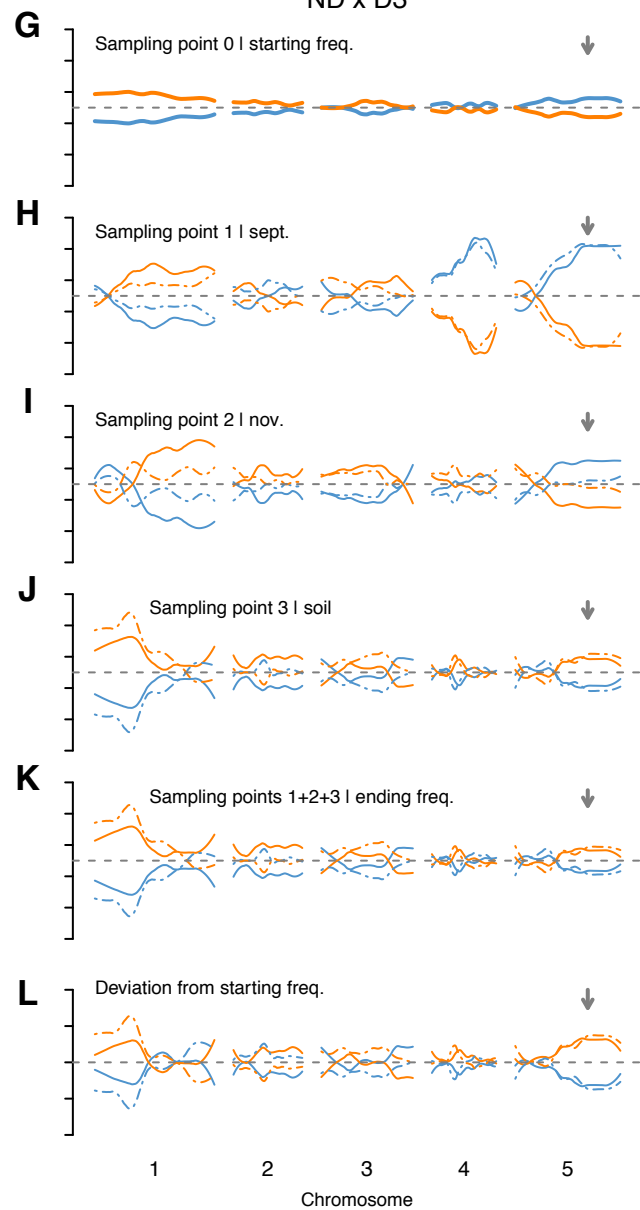

— ND — D2 — D3  
— Block 1 - - - Block 2

Supplement: supp [file elife-22502-supp-v1.zip]

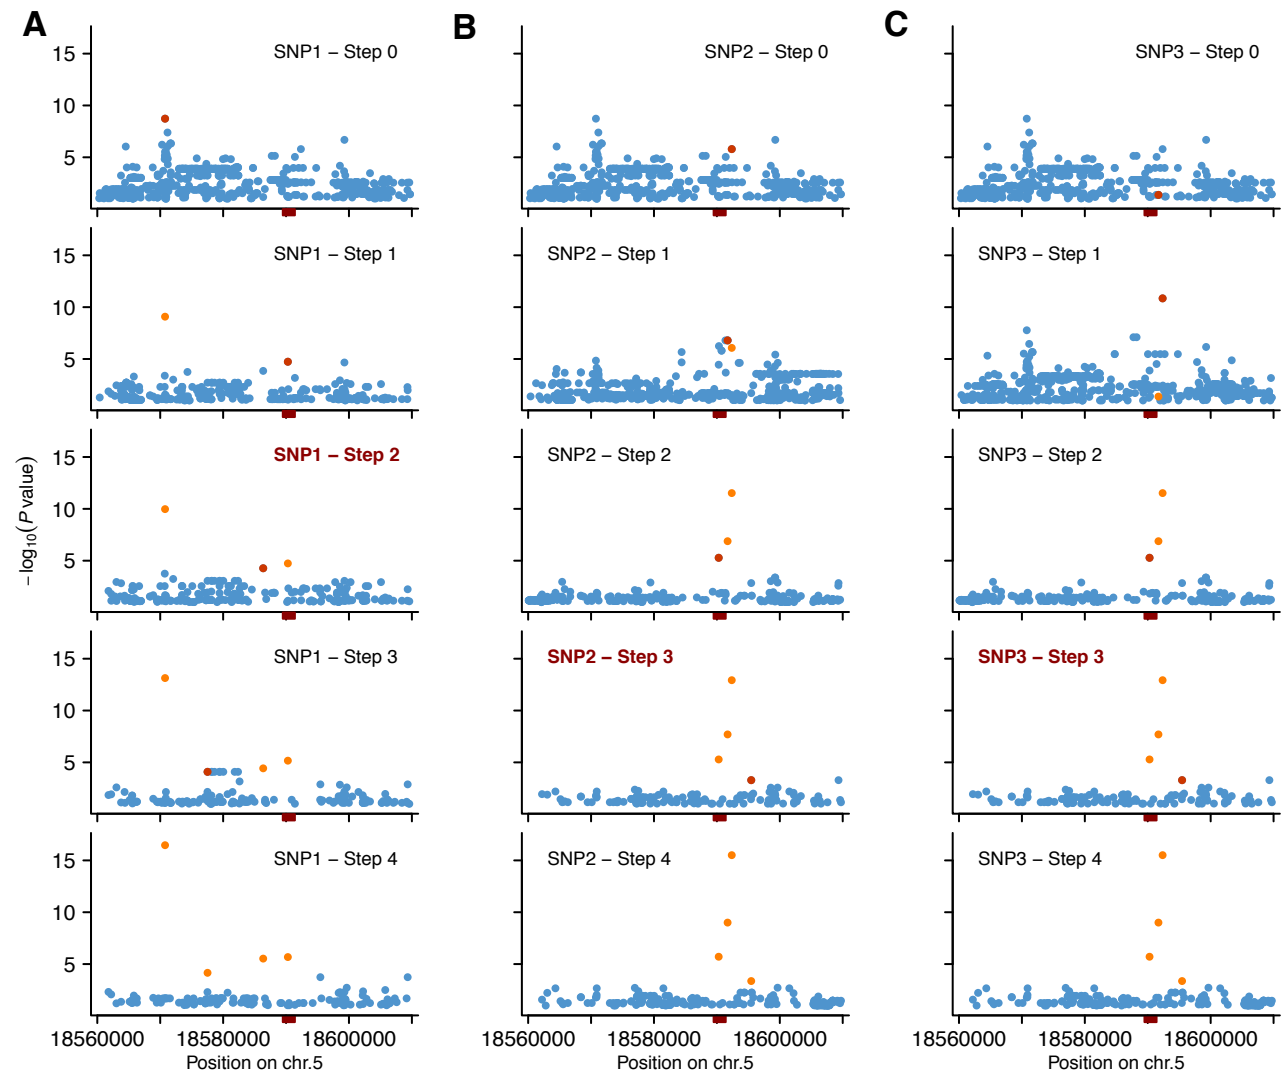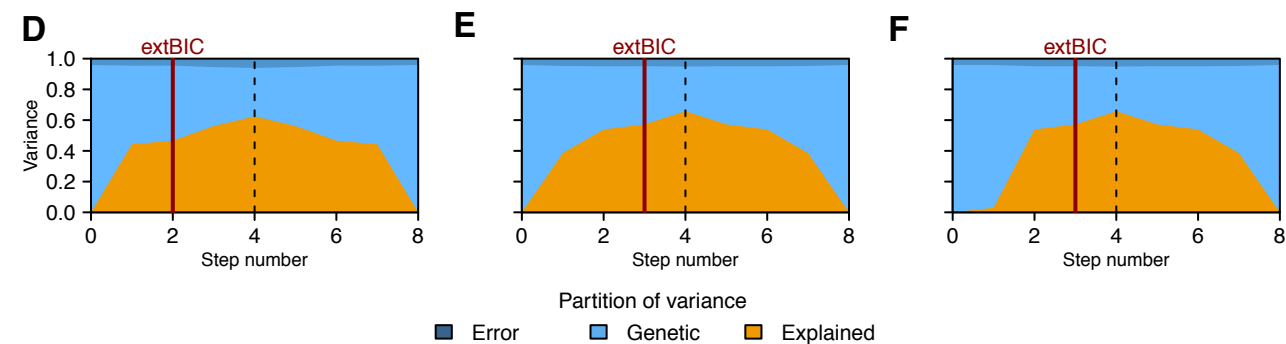

Supplement: supp [file elife-22502-supp-v1.zip]

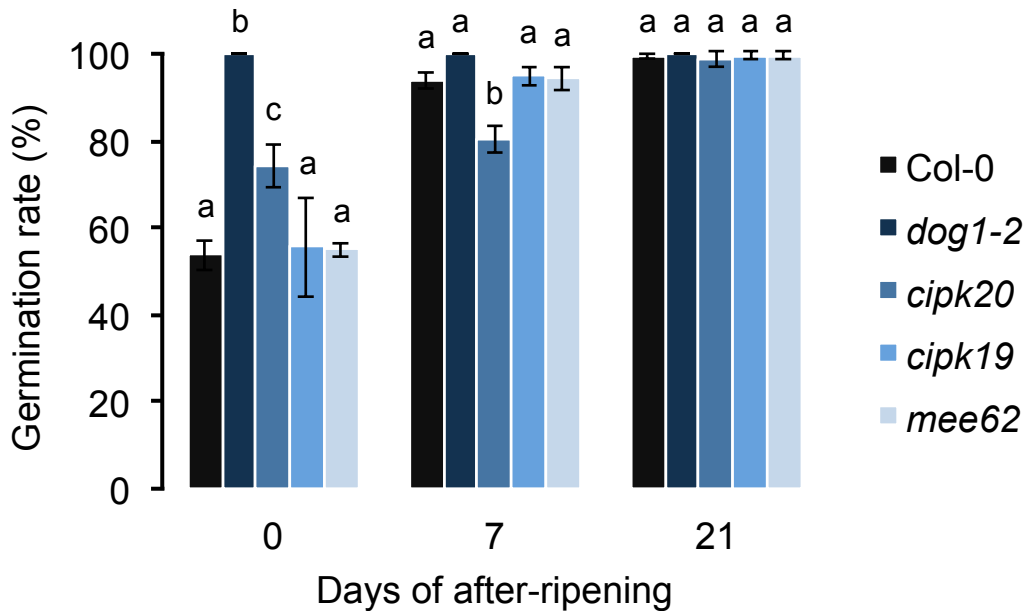

Supplement: supp [file elife-22502-supp-v1.zip]

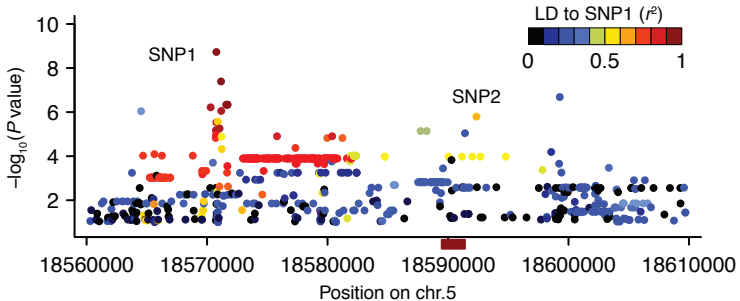

Supplement: supp [file elife-22502-supp-v1.zip]
